# Supplementary material for: Fostering Public Good Contributions with Symbolic Awards: A Large-Scale Natural Field Experiment at Wikipedia
Source: Atypon-hosted journal article supplement (doi:10.1287/mnsc.2016.2540), 2016-09-30
Supplement: mnsc.2016.2540-sm.pdf [file mnsc.2016.2540-sm.pdf]

Fostering Voluntary Contributions to a Public Good  
A Large-Scale Natural Field Experiment at Wikipedia

**ONLINE APPENDIX**

ONLINE APPENDIX A:

TABLE A1 – EXPERIMENTAL IMPLEMENTATION

| Cohort                  | New accounts | 1st time-contributors | 1st time-contributors of article content | <b>STEP 1:<br/>AUTOMATIC<br/>FILTER</b> | Remaining | <b>STEP 2:<br/>SCREENING<br/>w/<br/>RULEBOOK</b> | Remaining for random selection | Accounts blocked after awarding date (TG/CG) | <b>STEP 3:<br/>RANDOM<br/>ALLOCATION<br/>TG* / CG*</b> |
|-------------------------|--------------|-----------------------|------------------------------------------|-----------------------------------------|-----------|--------------------------------------------------|--------------------------------|----------------------------------------------|--------------------------------------------------------|
| 1 (Sep12)               | 7,187        | 3,202                 | 2,662                                    | -2,177                                  | 485       | -122                                             | 363                            | 10 (3/7)                                     | 147 / 206                                              |
| 2 (Oct12)               | 7,917        | 3,567                 | 2,931                                    | -2,590                                  | 341       | -44                                              | 297                            | 6 (3/3)                                      | 147 / 144                                              |
| 3 (Nov12)               | 9,088        | 3,739                 | 3,016                                    | -2,587                                  | 429       | -39                                              | 390                            | 12 (4/8)                                     | 146 / 232                                              |
| 4 (Dec12)               | 7,663        | 3,178                 | 2,629                                    | -2,194                                  | 435       | -78                                              | 357                            | 8 (5/3)                                      | 145 / 204                                              |
| 5 (Jan13)               | 9,147        | 4,225                 | 3,525                                    | -3,102                                  | 423       | -99                                              | 324                            | 5 (2/3)                                      | 148 / 171                                              |
| 6 (Feb13)               | 8,460        | 3,788                 | 3,128                                    | -2,443                                  | 685       | -170                                             | 515                            | 11 (2/9)                                     | 148 / 356                                              |
| 7 (Mar13)               | 8,439        | 3,638                 | 3,013                                    | -2,382                                  | 631       | -170                                             | 461                            | 21 (7/14)                                    | 143 / 297                                              |
| 8 (Apr13)               | 7,456        | 3,351                 | 2,729                                    | -2,165                                  | 564       | -162                                             | 402                            | 11 (5/6)                                     | 145 / 246                                              |
| 9 (May13)               | 7,520        | 3,459                 | 2,767                                    | -2,308                                  | 459       | -127                                             | 332                            | 4 (0/4)                                      | 150 / 178                                              |
| 10 (Jun13)              | 8,383        | 3,622                 | 2,927                                    | -2,425                                  | 502       | -156                                             | 346                            | 11 (1/10)                                    | 149 / 186                                              |
| 11 (Jul13) <sup>†</sup> | 7,693        | 3,233                 | 2,932                                    | -2,410                                  | 522       | -192                                             | 330                            | 11 (1/10)                                    | 149 / 170                                              |
| Sum                     |              |                       |                                          |                                         |           |                                                  | 4,117                          | 110 (33/77)                                  | <b>1,617 / 2,390</b>                                   |
| Total                   |              |                       |                                          |                                         |           |                                                  |                                |                                              | <b>4,007</b>                                           |

\* *Notes:* TG and CG stand for treatment group and control group. Accounts that have been blocked after the awarding date are no longer included in the data (figures as of May 6, 2015). As is explained on the corresponding Wikipedia page, "blocks [...] are used by administrators to technically prevent a user account [...] from editing Wikipedia. Blocks are used chiefly to deal with immediate problems such as vandalism or edit warring" See: [https://en.wikipedia.org/wiki/Wikipedia:Banning\\_policy](https://en.wikipedia.org/wiki/Wikipedia:Banning_policy) (June 5, 2015).

<sup>†</sup> The numbers given in the columns "New accounts" to and including "Step 1: Automatic Filter" are based on a data dump received in June 2015. Since some user accounts have been blocked over time, these numbers are slightly lower than they were in July 2013, when the automatic filter was applied.

ONLINE APPENDIX B

TABLE B1 – RANDOMIZATION CHECK

Ordinal variable: Level of article editing activity before awarding date.

Two-sample Wilcoxon rank-sum (Mann-Whitney) test

| award    | obs  | rank sum | expected |
|----------|------|----------|----------|
| 0        | 2390 | 4825695  | 4789560  |
| 1        | 1617 | 3204333  | 3240468  |
| combined | 4007 | 8030028  | 8030028  |

unadjusted variance 1.291e+09

adjustment for ties -3.346e+08

adjusted variance 9.562e+08

Ho:  $n\sim ea\_ord(award==0) = n\sim ea\_ord(award==1)$

z = 1.169

Prob > |z| = 0.2426

TABLE B2 — MULTIPLE TESTING ADJUSTMENTS

| Outcome                                | DI     | p-values  |                   |
|----------------------------------------|--------|-----------|-------------------|
|                                        |        | Unadj.    | Multiplicity Adj. |
| active                                 | 0.0666 | 0.0003*** | 0.0003***         |
| active (following 2 months)            | 0.0572 | 0.0003*** | 0.0003***         |
| active, only article edits             | 0.0363 | 0.016*    | 0.0317*           |
| active, only article edits (2 months)  | 0.0364 | 0.0197*   | 0.0197*           |
| degree of activity, only article edits | 0.0641 | 0.0167*   | 0.027*            |
| active on talk pages                   | 0.0664 | 0.0003*** | 0.0003***         |
| active on Wikipedia meta pages         | 0.0204 | 0.0113*   | 0.0327*           |
| user page self-edited                  | 0.0310 | 0.0003*** | 0.0003***         |
| user talk self-edited                  | 0.0441 | 0.0003*** | 0.0003***         |
| active, excl. award pages              | 0.0666 | 0.0003*** | 0.0003***         |
| active, excl. award & own pages        | 0.0537 | 0.001**   | 0.0027**          |

Notes: The p-value adjustments in column 4 are based on the procedure and code developed by List et al. (2016). DI refers to "difference in means". If not indicated otherwise outcomes refer to the first month after the initial intervention. \*  $p < 0.05$ , \*\*  $p < 0.01$ , \*\*\*  $p < 0.001$ .

TABLE B3 – EFFECT ON LEVEL OF ACTIVITY

1st month after awarding date, article edits only.

Two-sample Wilcoxon rank-sum (Mann-Whitney) test

| award    | obs  | rank sum  | expected |
|----------|------|-----------|----------|
| 0        | 2390 | 4715172.5 | 4789560  |
| 1        | 1617 | 3314855.5 | 3240468  |
| combined | 4007 | 8030028   | 8030028  |

unadjusted variance 1.291e+09

adjustment for ties -3.837e+08

adjusted variance 9.071e+08

Ho:  $n\sim ta\_ord(award==0) = n\sim ta\_ord(award==1)$

z = -2.470

Prob > |z| = 0.0135

TABLE B4 — ROBUSTNESS CHECKS

|                                                                                 | Treatment<br>(1) | Control<br>(2) | Difference<br>(3)  |
|---------------------------------------------------------------------------------|------------------|----------------|--------------------|
| <i>A. General activity (1st month)</i>                                          |                  |                |                    |
| active, excl. award pages                                                       | 0.42             | 0.35           | 0.07***<br>(0.000) |
| active, excl. award & own pages                                                 | 0.40             | 0.35           | 0.05***<br>(0.001) |
| <i>B. Treatment effect persistence. DV: active, excl. award &amp; own pages</i> |                  |                |                    |
| Quarter 1                                                                       | 0.51             | 0.47           | 0.04*<br>(0.013)   |
| Quarter 2                                                                       | 0.34             | 0.30           | 0.03*<br>(0.027)   |
| Quarter 3                                                                       | 0.26             | 0.24           | 0.03*<br>(0.048)   |
| Quarter 4                                                                       | 0.26             | 0.23           | 0.03*<br>(0.032)   |
| Quarter 5                                                                       | 0.21             | 0.20           | 0.02<br>(0.232)    |
| N                                                                               | 1617             | 2390           | 4007               |

Notes: Average values rounded to 2 decimal places. DV stands for dependent variable. *p*-values from Chi-square tests are reported in parentheses. Table B2 above also presents adjustments for multiple testing related to Panel A, which tests multiple outcomes falling into the same time period as the outcomes of the main analysis. The significance of the tests remains unchanged.

\*  $p < 0.05$ , \*\*  $p < 0.01$ , \*\*\*  $p < 0.001$ .
